# Supplementary material for: High ecological resilience of the sea fan Gorgonia ventalina during two severe hurricanes
Source: PeerJ. 2020 Nov 11;8:e10315. doi: 10.7717/peerj.10315 (PMC7666550; doi:10.7717/peerj.10315)
Supplement: Supplemental Information 1 — The height of all colonies along three transects that were surveyed art Yawzi Point and Tektite from 2013 to 2019. They can be used to calculate mean density (using transects as replicates), mean heights (using colonies as replicates) and mean growth (using colonies that were relocated in consecutive years). [file peerj-08-10315-s001.xlsx]

## Sheet: Height and density
Site	Transect	Year	Height (mm)		METADATA
Tektite	1	2013	30		1. These data support analysis of Gorgonia density and size structure at two sites from 2013-2019
Tektite	1	2013	50		2. Site = study site at Yawzi Point (9 m) or Tektie (14 m)
Tektite	1	2013	55		3. Transect = each transect along which surveys were conducted. Tektite T1 = 11.5 m long, T2 = 10.5 m long, T3 = 10.4 m long; Yawzi T1 = 10.6 m long, T2 = 9.8 m long, T3 = 11.9 m long. Surveys areas were bands 2 m wide along each transect
Tektite	1	2013	60		4. Survey year with all surveys conducted in August
Tektite	1	2013	60		5. Height = max colony height (mm) of all Gorgonia ventalina colonies found in study area.
Tektite	1	2013	70
Tektite	1	2013	100
Tektite	1	2013	130
Tektite	1	2013	130
Tektite	1	2013	140
Tektite	1	2013	160
Tektite	1	2013	180
Tektite	1	2013	205
Tektite	1	2013	210
Tektite	1	2013	230
Tektite	1	2013	240
Tektite	1	2013	240
Tektite	1	2013	250
Tektite	1	2013	260
Tektite	1	2013	290
Tektite	1	2013	300
Tektite	1	2013	420
Tektite	1	2013	570
Tektite	1	2013	580
Tektite	1	2013	640
Tektite	2	2013	40
Tektite	2	2013	50
Tektite	2	2013	145
Tektite	2	2013	155
Tektite	2	2013	220
Tektite	2	2013	230
Tektite	2	2013	240
Tektite	2	2013	265
Tektite	2	2013	295
Tektite	2	2013	300
Tektite	2	2013	450
Tektite	2	2013	475
Tektite	3	2013	51
Tektite	3	2013	51
Tektite	3	2013	65
Tektite	3	2013	71
Tektite	3	2013	100
Tektite	3	2013	115
Tektite	3	2013	150
Tektite	3	2013	174
Tektite	3	2013	209
Tektite	3	2013	306
Tektite	3	2013	320
Tektite	3	2013	362
Tektite	3	2013	455
Tektite	3	2013	610
Tektite	3	2013	710
Tektite	3	2013	926
Tektite	1	2014	50
Tektite	1	2014	50
Tektite	1	2014	80
Tektite	1	2014	80
Tektite	1	2014	100
Tektite	1	2014	190
Tektite	1	2014	200
Tektite	1	2014	200
Tektite	1	2014	220
Tektite	1	2014	220
Tektite	1	2014	240
Tektite	1	2014	260
Tektite	1	2014	260
Tektite	1	2014	280
Tektite	1	2014	290
Tektite	1	2014	310
Tektite	1	2014	330
Tektite	1	2014	350
Tektite	1	2014	390
Tektite	1	2014	560
Tektite	1	2014	600
Tektite	1	2014	600
Tektite	1	2014	870
Tektite	2	2014	40
Tektite	2	2014	100
Tektite	2	2014	150
Tektite	2	2014	220
Tektite	2	2014	250
Tektite	2	2014	290
Tektite	2	2014	340
Tektite	2	2014	340
Tektite	2	2014	350
Tektite	2	2014	500
Tektite	2	2014	510
Tektite	2	2014	510
Tektite	3	2014	60
Tektite	3	2014	80
Tektite	3	2014	80
Tektite	3	2014	150
Tektite	3	2014	170
Tektite	3	2014	190
Tektite	3	2014	230
Tektite	3	2014	350
Tektite	3	2014	360
Tektite	3	2014	570
Tektite	3	2014	800
Tektite	1	2015	60
Tektite	1	2015	80
Tektite	1	2015	90
Tektite	1	2015	90
Tektite	1	2015	100
Tektite	1	2015	120
Tektite	1	2015	200
Tektite	1	2015	210
Tektite	1	2015	210
Tektite	1	2015	220
Tektite	1	2015	230
Tektite	1	2015	280
Tektite	1	2015	280
Tektite	1	2015	300
Tektite	1	2015	320
Tektite	1	2015	330
Tektite	1	2015	360
Tektite	1	2015	390
Tektite	1	2015	440
Tektite	1	2015	530
Tektite	1	2015	690
Tektite	1	2015	690
Tektite	2	2015	100
Tektite	2	2015	150
Tektite	2	2015	170
Tektite	2	2015	170
Tektite	2	2015	260
Tektite	2	2015	290
Tektite	2	2015	290
Tektite	2	2015	340
Tektite	2	2015	370
Tektite	2	2015	410
Tektite	2	2015	490
Tektite	2	2015	590
Tektite	3	2015	80
Tektite	3	2015	110
Tektite	3	2015	130
Tektite	3	2015	150
Tektite	3	2015	200
Tektite	3	2015	210
Tektite	3	2015	220
Tektite	3	2015	250
Tektite	3	2015	390
Tektite	3	2015	420
Tektite	3	2015	420
Tektite	3	2015	460
Tektite	3	2015	720
Tektite	1	2016	40
Tektite	1	2016	40
Tektite	1	2016	60
Tektite	1	2016	140
Tektite	1	2016	140
Tektite	1	2016	140
Tektite	1	2016	260
Tektite	1	2016	270
Tektite	1	2016	270
Tektite	1	2016	290
Tektite	1	2016	310
Tektite	1	2016	350
Tektite	1	2016	360
Tektite	1	2016	360
Tektite	1	2016	380
Tektite	1	2016	440
Tektite	1	2016	440
Tektite	1	2016	480
Tektite	1	2016	580
Tektite	1	2016	640
Tektite	1	2016	720
Tektite	2	2016	50
Tektite	2	2016	100
Tektite	2	2016	100
Tektite	2	2016	120
Tektite	2	2016	130
Tektite	2	2016	170
Tektite	2	2016	170
Tektite	2	2016	200
Tektite	2	2016	210
Tektite	2	2016	370
Tektite	2	2016	390
Tektite	2	2016	450
Tektite	2	2016	630
Tektite	3	2016	30
Tektite	3	2016	30
Tektite	3	2016	60
Tektite	3	2016	70
Tektite	3	2016	150
Tektite	3	2016	150
Tektite	3	2016	150
Tektite	3	2016	180
Tektite	3	2016	240
Tektite	3	2016	270
Tektite	3	2016	290
Tektite	3	2016	300
Tektite	3	2016	310
Tektite	3	2016	390
Tektite	3	2016	420
Tektite	3	2016	440
Tektite	3	2016	510
Tektite	3	2016	830
Tektite	1	2017	28
Tektite	1	2017	30
Tektite	1	2017	50
Tektite	1	2017	50
Tektite	1	2017	50
Tektite	1	2017	50
Tektite	1	2017	60
Tektite	1	2017	70
Tektite	1	2017	70
Tektite	1	2017	80
Tektite	1	2017	120
Tektite	1	2017	170
Tektite	1	2017	180
Tektite	1	2017	210
Tektite	1	2017	330
Tektite	1	2017	330
Tektite	1	2017	350
Tektite	1	2017	350
Tektite	1	2017	360
Tektite	1	2017	400
Tektite	1	2017	400
Tektite	1	2017	410
Tektite	1	2017	450
Tektite	1	2017	470
Tektite	1	2017	480
Tektite	1	2017	610
Tektite	1	2017	610
Tektite	1	2017	640
Tektite	2	2017	80
Tektite	2	2017	120
Tektite	2	2017	150
Tektite	2	2017	160
Tektite	2	2017	220
Tektite	2	2017	230
Tektite	2	2017	330
Tektite	2	2017	400
Tektite	2	2017	420
Tektite	2	2017	430
Tektite	2	2017	480
Tektite	2	2017	640
Tektite	3	2017	40
Tektite	3	2017	50
Tektite	3	2017	70
Tektite	3	2017	110
Tektite	3	2017	120
Tektite	3	2017	120
Tektite	3	2017	140
Tektite	3	2017	140
Tektite	3	2017	170
Tektite	3	2017	200
Tektite	3	2017	230
Tektite	3	2017	300
Tektite	3	2017	310
Tektite	3	2017	330
Tektite	3	2017	380
Tektite	3	2017	430
Tektite	3	2017	480
Tektite	3	2017	490
Tektite	3	2017	490
Tektite	3	2017	900
Tektite	1	2018	60
Tektite	1	2018	80
Tektite	1	2018	100
Tektite	1	2018	100
Tektite	1	2018	150
Tektite	1	2018	180
Tektite	1	2018	200
Tektite	1	2018	250
Tektite	1	2018	250
Tektite	1	2018	300
Tektite	1	2018	310
Tektite	1	2018	360
Tektite	1	2018	360
Tektite	1	2018	380
Tektite	1	2018	390
Tektite	1	2018	430
Tektite	1	2018	450
Tektite	1	2018	470
Tektite	1	2018	500
Tektite	1	2018	530
Tektite	1	2018	650
Tektite	1	2018	670
Tektite	2	2018	80
Tektite	2	2018	220
Tektite	2	2018	220
Tektite	2	2018	260
Tektite	2	2018	270
Tektite	2	2018	350
Tektite	2	2018	420
Tektite	2	2018	450
Tektite	2	2018	450
Tektite	2	2018	450
Tektite	2	2018	530
Tektite	2	2018	610
Tektite	3	2018	110
Tektite	3	2018	140
Tektite	3	2018	200
Tektite	3	2018	230
Tektite	3	2018	360
Tektite	3	2018	370
Tektite	3	2018	430
Tektite	3	2018	520
Tektite	1	2019	30
Tektite	1	2019	40
Tektite	1	2019	80
Tektite	1	2019	80
Tektite	1	2019	100
Tektite	1	2019	100
Tektite	1	2019	140
Tektite	1	2019	140
Tektite	1	2019	240
Tektite	1	2019	270
Tektite	1	2019	280
Tektite	1	2019	300
Tektite	1	2019	360
Tektite	1	2019	380
Tektite	1	2019	390
Tektite	1	2019	390
Tektite	1	2019	460
Tektite	1	2019	460
Tektite	1	2019	490
Tektite	1	2019	510
Tektite	1	2019	510
Tektite	1	2019	540
Tektite	1	2019	620
Tektite	1	2019	660
Tektite	2	2019	30
Tektite	2	2019	260
Tektite	2	2019	320
Tektite	2	2019	330
Tektite	2	2019	330
Tektite	2	2019	430
Tektite	2	2019	460
Tektite	2	2019	490
Tektite	2	2019	500
Tektite	2	2019	560
Tektite	2	2019	610
Tektite	3	2019	60
Tektite	3	2019	60
Tektite	3	2019	80
Tektite	3	2019	80
Tektite	3	2019	120
Tektite	3	2019	190
Tektite	3	2019	210
Tektite	3	2019	230
Tektite	3	2019	240
Tektite	3	2019	280
Tektite	3	2019	380
Tektite	3	2019	380
Tektite	3	2019	380
Tektite	3	2019	420
Tektite	3	2019	470
Tektite	3	2019	500
Tektite	3	2019	530
Yawzi	1	2013	60
Yawzi	1	2013	90
Yawzi	1	2013	100
Yawzi	1	2013	110
Yawzi	1	2013	140
Yawzi	1	2013	165
Yawzi	1	2013	170
Yawzi	1	2013	190
Yawzi	1	2013	200
Yawzi	1	2013	210
Yawzi	1	2013	220
Yawzi	1	2013	240
Yawzi	1	2013	250
Yawzi	1	2013	260
Yawzi	1	2013	300
Yawzi	1	2013	310
Yawzi	1	2013	310
Yawzi	1	2013	310
Yawzi	1	2013	340
Yawzi	1	2013	340
Yawzi	1	2013	340
Yawzi	1	2013	400
Yawzi	1	2013	420
Yawzi	1	2013	430
Yawzi	1	2013	430
Yawzi	1	2013	430
Yawzi	1	2013	470
Yawzi	1	2013	470
Yawzi	1	2013	490
Yawzi	1	2013	520
Yawzi	1	2013	700
Yawzi	2	2013	41
Yawzi	2	2013	49
Yawzi	2	2013	54
Yawzi	2	2013	55
Yawzi	2	2013	69
Yawzi	2	2013	78
Yawzi	2	2013	96
Yawzi	2	2013	119
Yawzi	2	2013	127
Yawzi	2	2013	136
Yawzi	2	2013	181
Yawzi	2	2013	207
Yawzi	2	2013	207
Yawzi	2	2013	225
Yawzi	2	2013	236
Yawzi	2	2013	243
Yawzi	2	2013	257
Yawzi	2	2013	268
Yawzi	2	2013	270
Yawzi	2	2013	286
Yawzi	2	2013	288
Yawzi	2	2013	315
Yawzi	2	2013	418
Yawzi	2	2013	420
Yawzi	2	2013	614
Yawzi	3	2013	45
Yawzi	3	2013	50
Yawzi	3	2013	50
Yawzi	3	2013	50
Yawzi	3	2013	60
Yawzi	3	2013	90
Yawzi	3	2013	100
Yawzi	3	2013	110
Yawzi	3	2013	140
Yawzi	3	2013	150
Yawzi	3	2013	200
Yawzi	3	2013	210
Yawzi	3	2013	210
Yawzi	3	2013	210
Yawzi	3	2013	230
Yawzi	3	2013	230
Yawzi	3	2013	230
Yawzi	3	2013	240
Yawzi	3	2013	240
Yawzi	3	2013	240
Yawzi	3	2013	250
Yawzi	3	2013	260
Yawzi	3	2013	290
Yawzi	3	2013	300
Yawzi	3	2013	350
Yawzi	3	2013	350
Yawzi	3	2013	450
Yawzi	3	2013	500
Yawzi	1	2014	140
Yawzi	1	2014	140
Yawzi	1	2014	160
Yawzi	1	2014	170
Yawzi	1	2014	210
Yawzi	1	2014	220
Yawzi	1	2014	220
Yawzi	1	2014	230
Yawzi	1	2014	240
Yawzi	1	2014	250
Yawzi	1	2014	280
Yawzi	1	2014	290
Yawzi	1	2014	340
Yawzi	1	2014	350
Yawzi	1	2014	350
Yawzi	1	2014	360
Yawzi	1	2014	370
Yawzi	1	2014	370
Yawzi	1	2014	440
Yawzi	1	2014	450
Yawzi	1	2014	450
Yawzi	1	2014	460
Yawzi	1	2014	480
Yawzi	1	2014	480
Yawzi	1	2014	490
Yawzi	1	2014	510
Yawzi	1	2014	710
Yawzi	2	2014	30
Yawzi	2	2014	50
Yawzi	2	2014	80
Yawzi	2	2014	100
Yawzi	2	2014	100
Yawzi	2	2014	120
Yawzi	2	2014	140
Yawzi	2	2014	160
Yawzi	2	2014	160
Yawzi	2	2014	170
Yawzi	2	2014	180
Yawzi	2	2014	220
Yawzi	2	2014	230
Yawzi	2	2014	240
Yawzi	2	2014	260
Yawzi	2	2014	270
Yawzi	2	2014	280
Yawzi	2	2014	290
Yawzi	2	2014	320
Yawzi	2	2014	320
Yawzi	2	2014	330
Yawzi	2	2014	330
Yawzi	2	2014	450
Yawzi	2	2014	620
Yawzi	3	2014	50
Yawzi	3	2014	50
Yawzi	3	2014	90
Yawzi	3	2014	100
Yawzi	3	2014	160
Yawzi	3	2014	170
Yawzi	3	2014	190
Yawzi	3	2014	230
Yawzi	3	2014	240
Yawzi	3	2014	240
Yawzi	3	2014	240
Yawzi	3	2014	250
Yawzi	3	2014	270
Yawzi	3	2014	280
Yawzi	3	2014	280
Yawzi	3	2014	290
Yawzi	3	2014	300
Yawzi	3	2014	360
Yawzi	3	2014	360
Yawzi	3	2014	420
Yawzi	3	2014	450
Yawzi	3	2014	510
Yawzi	1	2015	30
Yawzi	1	2015	30
Yawzi	1	2015	40
Yawzi	1	2015	80
Yawzi	1	2015	100
Yawzi	1	2015	100
Yawzi	1	2015	120
Yawzi	1	2015	120
Yawzi	1	2015	140
Yawzi	1	2015	150
Yawzi	1	2015	160
Yawzi	1	2015	180
Yawzi	1	2015	200
Yawzi	1	2015	200
Yawzi	1	2015	250
Yawzi	1	2015	260
Yawzi	1	2015	270
Yawzi	1	2015	280
Yawzi	1	2015	280
Yawzi	1	2015	300
Yawzi	1	2015	300
Yawzi	1	2015	310
Yawzi	1	2015	330
Yawzi	1	2015	330
Yawzi	1	2015	350
Yawzi	1	2015	360
Yawzi	1	2015	400
Yawzi	1	2015	400
Yawzi	1	2015	450
Yawzi	1	2015	480
Yawzi	1	2015	500
Yawzi	1	2015	510
Yawzi	1	2015	510
Yawzi	1	2015	510
Yawzi	1	2015	520
Yawzi	1	2015	520
Yawzi	1	2015	590
Yawzi	2	2015	100
Yawzi	2	2015	110
Yawzi	2	2015	120
Yawzi	2	2015	160
Yawzi	2	2015	160
Yawzi	2	2015	170
Yawzi	2	2015	170
Yawzi	2	2015	200
Yawzi	2	2015	260
Yawzi	2	2015	260
Yawzi	2	2015	260
Yawzi	2	2015	260
Yawzi	2	2015	280
Yawzi	2	2015	290
Yawzi	2	2015	310
Yawzi	2	2015	340
Yawzi	2	2015	360
Yawzi	2	2015	360
Yawzi	2	2015	370
Yawzi	2	2015	530
Yawzi	2	2015	570
Yawzi	3	2015	70
Yawzi	3	2015	100
Yawzi	3	2015	110
Yawzi	3	2015	140
Yawzi	3	2015	160
Yawzi	3	2015	180
Yawzi	3	2015	180
Yawzi	3	2015	240
Yawzi	3	2015	250
Yawzi	3	2015	250
Yawzi	3	2015	260
Yawzi	3	2015	280
Yawzi	3	2015	280
Yawzi	3	2015	290
Yawzi	3	2015	290
Yawzi	3	2015	330
Yawzi	3	2015	330
Yawzi	3	2015	350
Yawzi	3	2015	360
Yawzi	3	2015	390
Yawzi	3	2015	400
Yawzi	3	2015	420
Yawzi	3	2015	480
Yawzi	3	2015	490
Yawzi	3	2015	790
Yawzi	1	2016	30
Yawzi	1	2016	80
Yawzi	1	2016	90
Yawzi	1	2016	100
Yawzi	1	2016	130
Yawzi	1	2016	160
Yawzi	1	2016	160
Yawzi	1	2016	170
Yawzi	1	2016	190
Yawzi	1	2016	200
Yawzi	1	2016	210
Yawzi	1	2016	210
Yawzi	1	2016	260
Yawzi	1	2016	260
Yawzi	1	2016	290
Yawzi	1	2016	300
Yawzi	1	2016	300
Yawzi	1	2016	320
Yawzi	1	2016	330
Yawzi	1	2016	340
Yawzi	1	2016	350
Yawzi	1	2016	370
Yawzi	1	2016	380
Yawzi	1	2016	390
Yawzi	1	2016	390
Yawzi	1	2016	410
Yawzi	1	2016	450
Yawzi	1	2016	450
Yawzi	1	2016	470
Yawzi	1	2016	500
Yawzi	1	2016	500
Yawzi	1	2016	500
Yawzi	1	2016	540
Yawzi	1	2016	560
Yawzi	1	2016	580
Yawzi	1	2016	580
Yawzi	1	2016	650
Yawzi	2	2016	60
Yawzi	2	2016	60
Yawzi	2	2016	70
Yawzi	2	2016	70
Yawzi	2	2016	90
Yawzi	2	2016	100
Yawzi	2	2016	110
Yawzi	2	2016	110
Yawzi	2	2016	130
Yawzi	2	2016	160
Yawzi	2	2016	170
Yawzi	2	2016	190
Yawzi	2	2016	210
Yawzi	2	2016	230
Yawzi	2	2016	230
Yawzi	2	2016	250
Yawzi	2	2016	270
Yawzi	2	2016	290
Yawzi	2	2016	290
Yawzi	2	2016	320
Yawzi	2	2016	330
Yawzi	2	2016	350
Yawzi	2	2016	370
Yawzi	2	2016	380
Yawzi	2	2016	390
Yawzi	2	2016	640
Yawzi	3	2016	50
Yawzi	3	2016	70
Yawzi	3	2016	80
Yawzi	3	2016	110
Yawzi	3	2016	150
Yawzi	3	2016	160
Yawzi	3	2016	180
Yawzi	3	2016	200
Yawzi	3	2016	200
Yawzi	3	2016	220
Yawzi	3	2016	220
Yawzi	3	2016	220
Yawzi	3	2016	280
Yawzi	3	2016	280
Yawzi	3	2016	300
Yawzi	3	2016	310
Yawzi	3	2016	330
Yawzi	3	2016	330
Yawzi	3	2016	350
Yawzi	3	2016	360
Yawzi	3	2016	360
Yawzi	3	2016	380
Yawzi	3	2016	410
Yawzi	3	2016	440
Yawzi	3	2016	470
Yawzi	3	2016	500
Yawzi	3	2016	560
Yawzi	1	2017	30
Yawzi	1	2017	60
Yawzi	1	2017	60
Yawzi	1	2017	70
Yawzi	1	2017	80
Yawzi	1	2017	100
Yawzi	1	2017	140
Yawzi	1	2017	150
Yawzi	1	2017	150
Yawzi	1	2017	160
Yawzi	1	2017	170
Yawzi	1	2017	230
Yawzi	1	2017	250
Yawzi	1	2017	250
Yawzi	1	2017	270
Yawzi	1	2017	290
Yawzi	1	2017	290
Yawzi	1	2017	300
Yawzi	1	2017	310
Yawzi	1	2017	320
Yawzi	1	2017	370
Yawzi	1	2017	380
Yawzi	1	2017	380
Yawzi	1	2017	390
Yawzi	1	2017	410
Yawzi	1	2017	420
Yawzi	1	2017	450
Yawzi	1	2017	460
Yawzi	1	2017	490
Yawzi	1	2017	510
Yawzi	1	2017	530
Yawzi	1	2017	540
Yawzi	1	2017	550
Yawzi	1	2017	580
Yawzi	1	2017	580
Yawzi	1	2017	600
Yawzi	1	2017	650
Yawzi	1	2017	740
Yawzi	2	2017	30
Yawzi	2	2017	50
Yawzi	2	2017	60
Yawzi	2	2017	60
Yawzi	2	2017	70
Yawzi	2	2017	70
Yawzi	2	2017	80
Yawzi	2	2017	80
Yawzi	2	2017	90
Yawzi	2	2017	100
Yawzi	2	2017	130
Yawzi	2	2017	150
Yawzi	2	2017	150
Yawzi	2	2017	180
Yawzi	2	2017	190
Yawzi	2	2017	200
Yawzi	2	2017	240
Yawzi	2	2017	260
Yawzi	2	2017	290
Yawzi	2	2017	300
Yawzi	2	2017	310
Yawzi	2	2017	320
Yawzi	2	2017	330
Yawzi	2	2017	330
Yawzi	2	2017	370
Yawzi	2	2017	400
Yawzi	2	2017	410
Yawzi	2	2017	420
Yawzi	2	2017	440
Yawzi	3	2017	60
Yawzi	3	2017	60
Yawzi	3	2017	60
Yawzi	3	2017	70
Yawzi	3	2017	70
Yawzi	3	2017	80
Yawzi	3	2017	90
Yawzi	3	2017	100
Yawzi	3	2017	110
Yawzi	3	2017	110
Yawzi	3	2017	120
Yawzi	3	2017	130
Yawzi	3	2017	210
Yawzi	3	2017	220
Yawzi	3	2017	220
Yawzi	3	2017	230
Yawzi	3	2017	240
Yawzi	3	2017	290
Yawzi	3	2017	310
Yawzi	3	2017	330
Yawzi	3	2017	330
Yawzi	3	2017	350
Yawzi	3	2017	360
Yawzi	3	2017	370
Yawzi	3	2017	380
Yawzi	3	2017	410
Yawzi	3	2017	420
Yawzi	3	2017	460
Yawzi	3	2017	470
Yawzi	3	2017	540
Yawzi	1	2018	100
Yawzi	1	2018	130
Yawzi	1	2018	150
Yawzi	1	2018	170
Yawzi	1	2018	190
Yawzi	1	2018	190
Yawzi	1	2018	200
Yawzi	1	2018	200
Yawzi	1	2018	210
Yawzi	1	2018	260
Yawzi	1	2018	270
Yawzi	1	2018	270
Yawzi	1	2018	290
Yawzi	1	2018	330
Yawzi	1	2018	330
Yawzi	1	2018	350
Yawzi	1	2018	370
Yawzi	1	2018	370
Yawzi	1	2018	370
Yawzi	1	2018	400
Yawzi	1	2018	420
Yawzi	1	2018	450
Yawzi	1	2018	450
Yawzi	1	2018	480
Yawzi	1	2018	480
Yawzi	1	2018	530
Yawzi	1	2018	530
Yawzi	1	2018	540
Yawzi	1	2018	540
Yawzi	1	2018	550
Yawzi	1	2018	610
Yawzi	1	2018	640
Yawzi	2	2018	66
Yawzi	2	2018	100
Yawzi	2	2018	100
Yawzi	2	2018	110
Yawzi	2	2018	120
Yawzi	2	2018	130
Yawzi	2	2018	130
Yawzi	2	2018	140
Yawzi	2	2018	150
Yawzi	2	2018	150
Yawzi	2	2018	180
Yawzi	2	2018	210
Yawzi	2	2018	210
Yawzi	2	2018	230
Yawzi	2	2018	260
Yawzi	2	2018	280
Yawzi	2	2018	320
Yawzi	2	2018	330
Yawzi	2	2018	360
Yawzi	2	2018	370
Yawzi	2	2018	390
Yawzi	2	2018	450
Yawzi	1	2019	10
Yawzi	1	2019	80
Yawzi	1	2019	80
Yawzi	1	2019	100
Yawzi	1	2019	100
Yawzi	1	2019	130
Yawzi	1	2019	130
Yawzi	1	2019	150
Yawzi	1	2019	160
Yawzi	1	2019	190
Yawzi	1	2019	200
Yawzi	1	2019	220
Yawzi	1	2019	250
Yawzi	1	2019	250
Yawzi	1	2019	280
Yawzi	1	2019	290
Yawzi	1	2019	290
Yawzi	1	2019	320
Yawzi	1	2019	340
Yawzi	1	2019	340
Yawzi	1	2019	350
Yawzi	1	2019	380
Yawzi	1	2019	380
Yawzi	1	2019	400
Yawzi	1	2019	430
Yawzi	1	2019	470
Yawzi	1	2019	470
Yawzi	1	2019	470
Yawzi	1	2019	480
Yawzi	1	2019	520
Yawzi	1	2019	520
Yawzi	1	2019	530
Yawzi	1	2019	560
Yawzi	1	2019	560
Yawzi	1	2019	610
Yawzi	1	2019	660
Yawzi	2	2019	40
Yawzi	2	2019	90
Yawzi	2	2019	110
Yawzi	2	2019	130
Yawzi	2	2019	130
Yawzi	2	2019	150
Yawzi	2	2019	150
Yawzi	2	2019	160
Yawzi	2	2019	170
Yawzi	2	2019	180
Yawzi	2	2019	180
Yawzi	2	2019	210
Yawzi	2	2019	230
Yawzi	2	2019	250
Yawzi	2	2019	270
Yawzi	2	2019	290
Yawzi	2	2019	310
Yawzi	2	2019	330
Yawzi	2	2019	360
Yawzi	2	2019	360
Yawzi	2	2019	390
Yawzi	2	2019	410
Yawzi	2	2019	420
Yawzi	3	2019	70
Yawzi	3	2019	80
Yawzi	3	2019	90
Yawzi	3	2019	90
Yawzi	3	2019	110
Yawzi	3	2019	180
Yawzi	3	2019	180
Yawzi	3	2019	290
Yawzi	3	2019	310
Yawzi	3	2019	370
Yawzi	3	2019	390
Yawzi	3	2019	390
Yawzi	3	2019	430
Yawzi	3	2019	540
Yawzi	3	2019	610

## Sheet: Growth
Site	Interval	Start (mm)	Final (mm)		METADATA
Yawzi	2013-2014	340	340		1. These data support analysis of Gorgonia growth at two sites from 2013-2019
Yawzi	2013-2014	240	240		2. Site = study site at Yawzi Point (9 m) or Tektie (14 m)
Yawzi	2013-2014	288	290		3. Interval = growth period over which height was measured at the start and end of the year
Yawzi	2013-2014	315	320		4. Start = initial height (mm)
Yawzi	2013-2014	45	50		5. Final = final height (mm) after 12 months
Yawzi	2013-2014	614	620		6. These data refer to only the colonies that were accurately relocated using the Cartesian coordinates at the start and end of each year
Yawzi	2013-2014	350	360
Yawzi	2013-2014	260	270
Yawzi	2013-2014	150	160
Yawzi	2013-2014	500	510
Yawzi	2013-2014	268	280
Yawzi	2013-2014	470	490
Yawzi	2013-2014	430	450
Yawzi	2013-2014	490	510
Yawzi	2013-2014	430	450
Yawzi	2013-2014	230	250
Yawzi	2013-2014	210	230
Yawzi	2013-2014	96	120
Yawzi	2013-2014	55	80
Yawzi	2013-2014	243	270
Yawzi	2013-2014	110	140
Yawzi	2013-2014	200	230
Yawzi	2013-2014	140	170
Yawzi	2013-2014	340	370
Yawzi	2013-2014	210	240
Yawzi	2013-2014	69	100
Yawzi	2013-2014	418	450
Yawzi	2013-2014	207	240
Yawzi	2013-2014	127	160
Yawzi	2013-2014	286	320
Yawzi	2013-2014	420	460
Yawzi	2013-2014	50	90
Yawzi	2013-2014	240	280
Yawzi	2013-2014	119	160
Yawzi	2013-2014	136	180
Yawzi	2013-2014	181	230
Yawzi	2013-2014	430	480
Yawzi	2013-2014	310	360
Yawzi	2013-2014	190	240
Yawzi	2013-2014	250	300
Yawzi	2013-2014	240	290
Yawzi	2013-2014	49	100
Yawzi	2013-2014	165	220
Yawzi	2013-2014	310	370
Yawzi	2013-2014	220	280
Yawzi	2013-2014	100	160
Yawzi	2013-2014	78	140
Yawzi	2013-2014	290	360
Yawzi	2013-2014	350	420
Yawzi	2013-2014	257	330
Yawzi	2013-2014	400	480
Yawzi	2013-2014	210	290
Yawzi	2013-2014	170	250
Yawzi	2013-2014	200	280
Yawzi	2013-2014	260	350
Yawzi	2013-2014	100	190
Yawzi	2013-2014	250	350
Yawzi	2014-2015	140	140
Yawzi	2014-2015	420	420
Yawzi	2014-2015	250	250
Yawzi	2014-2015	160	170
Yawzi	2014-2015	280	290
Yawzi	2014-2015	280	300
Yawzi	2014-2015	290	310
Yawzi	2014-2015	250	270
Yawzi	2014-2015	340	360
Yawzi	2014-2015	100	120
Yawzi	2014-2015	260	280
Yawzi	2014-2015	50	70
Yawzi	2014-2015	160	180
Yawzi	2014-2015	490	520
Yawzi	2014-2015	480	510
Yawzi	2014-2015	450	480
Yawzi	2014-2015	220	250
Yawzi	2014-2015	370	400
Yawzi	2014-2015	80	110
Yawzi	2014-2015	140	170
Yawzi	2014-2015	330	360
Yawzi	2014-2015	300	330
Yawzi	2014-2015	160	200
Yawzi	2014-2015	160	200
Yawzi	2014-2015	120	160
Yawzi	2014-2015	270	310
Yawzi	2014-2015	220	260
Yawzi	2014-2015	360	400
Yawzi	2014-2015	240	280
Yawzi	2014-2015	230	280
Yawzi	2014-2015	320	370
Yawzi	2014-2015	290	340
Yawzi	2014-2015	190	240
Yawzi	2014-2015	460	520
Yawzi	2014-2015	440	500
Yawzi	2014-2015	220	280
Yawzi	2014-2015	450	510
Yawzi	2014-2015	240	300
Yawzi	2014-2015	100	160
Yawzi	2014-2015	370	450
Yawzi	2014-2015	450	530
Yawzi	2014-2015	180	260
Yawzi	2014-2015	170	250
Yawzi	2015-2016	500	500
Yawzi	2015-2016	450	450
Yawzi	2015-2016	260	260
Yawzi	2015-2016	370	370
Yawzi	2015-2016	160	160
Yawzi	2015-2016	70	70
Yawzi	2015-2016	180	180
Yawzi	2015-2016	280	290
Yawzi	2015-2016	400	410
Yawzi	2015-2016	280	290
Yawzi	2015-2016	260	270
Yawzi	2015-2016	340	350
Yawzi	2015-2016	140	160
Yawzi	2015-2016	520	540
Yawzi	2015-2016	330	350
Yawzi	2015-2016	360	380
Yawzi	2015-2016	170	190
Yawzi	2015-2016	360	380
Yawzi	2015-2016	360	380
Yawzi	2015-2016	260	280
Yawzi	2015-2016	180	210
Yawzi	2015-2016	200	230
Yawzi	2015-2016	260	290
Yawzi	2015-2016	330	360
Yawzi	2015-2016	250	280
Yawzi	2015-2016	160	200
Yawzi	2015-2016	280	320
Yawzi	2015-2016	300	340
Yawzi	2015-2016	150	190
Yawzi	2015-2016	120	160
Yawzi	2015-2016	290	330
Yawzi	2015-2016	180	220
Yawzi	2015-2016	400	440
Yawzi	2015-2016	80	130
Yawzi	2015-2016	250	300
Yawzi	2015-2016	400	450
Yawzi	2015-2016	120	170
Yawzi	2015-2016	110	160
Yawzi	2015-2016	310	370
Yawzi	2015-2016	270	330
Yawzi	2015-2016	200	260
Yawzi	2015-2016	330	390
Yawzi	2015-2016	590	650
Yawzi	2015-2016	140	200
Yawzi	2015-2016	290	350
Yawzi	2015-2016	510	580
Yawzi	2015-2016	510	580
Yawzi	2015-2016	160	230
Yawzi	2015-2016	240	310
Yawzi	2015-2016	490	560
Yawzi	2015-2016	310	390
Yawzi	2015-2016	330	410
Yawzi	2015-2016	420	500
Yawzi	2015-2016	300	390
Yawzi	2016-2017	160	160
Yawzi	2016-2017	580	580
Yawzi	2016-2017	450	450
Yawzi	2016-2017	190	190
Yawzi	2016-2017	330	330
Yawzi	2016-2017	90	90
Yawzi	2016-2017	290	290
Yawzi	2016-2017	380	380
Yawzi	2016-2017	470	470
Yawzi	2016-2017	500	510
Yawzi	2016-2017	410	420
Yawzi	2016-2017	220	230
Yawzi	2016-2017	280	290
Yawzi	2016-2017	350	360
Yawzi	2016-2017	560	580
Yawzi	2016-2017	390	410
Yawzi	2016-2017	60	80
Yawzi	2016-2017	350	370
Yawzi	2016-2017	200	220
Yawzi	2016-2017	440	460
Yawzi	2016-2017	220	240
Yawzi	2016-2017	290	320
Yawzi	2016-2017	30	60
Yawzi	2016-2017	370	400
Yawzi	2016-2017	390	420
Yawzi	2016-2017	50	80
Yawzi	2016-2017	300	330
Yawzi	2016-2017	130	170
Yawzi	2016-2017	340	380
Yawzi	2016-2017	260	300
Yawzi	2016-2017	290	330
Yawzi	2016-2017	160	200
Yawzi	2016-2017	500	540
Yawzi	2016-2017	70	110
Yawzi	2016-2017	180	220
Yawzi	2016-2017	500	550
Yawzi	2016-2017	260	310
Yawzi	2016-2017	100	150
Yawzi	2016-2017	130	180
Yawzi	2016-2017	160	210
Yawzi	2016-2017	360	410
Yawzi	2016-2017	90	150
Yawzi	2016-2017	540	600
Yawzi	2016-2017	470	530
Yawzi	2016-2017	330	390
Yawzi	2016-2017	190	250
Yawzi	2016-2017	250	310
Yawzi	2016-2017	380	440
Yawzi	2016-2017	70	130
Yawzi	2016-2017	80	150
Yawzi	2016-2017	170	240
Yawzi	2016-2017	230	300
Yawzi	2016-2017	280	350
Yawzi	2016-2017	210	290
Yawzi	2016-2017	210	290
Yawzi	2016-2017	300	380
Yawzi	2016-2017	450	540
Yawzi	2016-2017	650	740
Yawzi	2016-2017	160	250
Yawzi	2016-2017	230	320
Yawzi	2016-2017	320	410
Yawzi	2016-2017	320	420
Yawzi	2016-2017	170	270
Yawzi	2016-2017	390	490
Yawzi	2017-2018	540	540
Yawzi	2017-2018	530	530
Yawzi	2017-2018	160	170
Yawzi	2017-2018	100	110
Yawzi	2017-2018	440	450
Yawzi	2017-2018	90	100
Yawzi	2017-2018	130	140
Yawzi	2017-2018	270	290
Yawzi	2017-2018	380	400
Yawzi	2017-2018	190	210
Yawzi	2017-2018	300	320
Yawzi	2017-2018	170	200
Yawzi	2017-2018	420	450
Yawzi	2017-2018	580	610
Yawzi	2017-2018	300	330
Yawzi	2017-2018	450	480
Yawzi	2017-2018	70	100
Yawzi	2017-2018	60	100
Yawzi	2017-2018	150	190
Yawzi	2017-2018	600	640
Yawzi	2017-2018	230	270
Yawzi	2017-2018	240	280
Yawzi	2017-2018	140	190
Yawzi	2017-2018	100	150
Yawzi	2017-2018	320	370
Yawzi	2017-2018	290	350
Yawzi	2017-2018	260	330
Yawzi	2018-2019	130	130
Yawzi	2018-2019	610	610
Yawzi	2018-2019	400	400
Yawzi	2018-2019	230	230
Yawzi	2018-2019	180	180
Yawzi	2018-2019	360	360
Yawzi	2018-2019	130	130
Yawzi	2018-2019	150	150
Yawzi	2018-2019	370	380
Yawzi	2018-2019	330	340
Yawzi	2018-2019	330	340
Yawzi	2018-2019	100	110
Yawzi	2018-2019	260	270
Yawzi	2018-2019	140	150
Yawzi	2018-2019	200	220
Yawzi	2018-2019	540	560
Yawzi	2018-2019	640	660
Yawzi	2018-2019	270	290
Yawzi	2018-2019	110	130
Yawzi	2018-2019	330	360
Yawzi	2018-2019	370	410
Yawzi	2018-2019	420	470
Yawzi	2018-2019	150	200
Yawzi	2018-2019	190	250
Yawzi	2018-2019	100	160
Yawzi	2018-2019	260	320
Yawzi	2018-2019	100	160
Yawzi	2018-2019	480	560
Yawzi	2018-2019	210	290
Yawzi	2018-2019	190	290
Tektite	2013-2014	100	100
Tektite	2013-2014	50	50
Tektite	2013-2014	40	40
Tektite	2013-2014	145	150
Tektite	2013-2014	51	60
Tektite	2013-2014	210	220
Tektite	2013-2014	70	80
Tektite	2013-2014	205	220
Tektite	2013-2014	580	600
Tektite	2013-2014	240	260
Tektite	2013-2014	60	80
Tektite	2013-2014	150	170
Tektite	2013-2014	51	80
Tektite	2013-2014	300	330
Tektite	2013-2014	220	250
Tektite	2013-2014	475	510
Tektite	2013-2014	240	280
Tektite	2013-2014	160	200
Tektite	2013-2014	300	340
Tektite	2013-2014	320	360
Tektite	2013-2014	295	340
Tektite	2013-2014	240	290
Tektite	2013-2014	50	100
Tektite	2013-2014	100	150
Tektite	2013-2014	174	230
Tektite	2013-2014	130	190
Tektite	2013-2014	230	290
Tektite	2013-2014	140	200
Tektite	2013-2014	250	310
Tektite	2013-2014	450	510
Tektite	2013-2014	155	220
Tektite	2013-2014	180	260
Tektite	2013-2014	265	350
Tektite	2013-2014	260	350
Tektite	2014-2015	250	260
Tektite	2014-2015	280	300
Tektite	2014-2015	200	220
Tektite	2014-2015	310	330
Tektite	2014-2015	150	170
Tektite	2014-2015	350	370
Tektite	2014-2015	230	250
Tektite	2014-2015	190	210
Tektite	2014-2015	80	110
Tektite	2014-2015	190	230
Tektite	2014-2015	290	340
Tektite	2014-2015	100	150
Tektite	2014-2015	170	220
Tektite	2014-2015	150	200
Tektite	2014-2015	220	280
Tektite	2014-2015	330	390
Tektite	2014-2015	260	320
Tektite	2014-2015	40	100
Tektite	2014-2015	290	360
Tektite	2014-2015	340	410
Tektite	2014-2015	220	290
Tektite	2014-2015	80	150
Tektite	2014-2015	510	590
Tektite	2014-2015	600	690
Tektite	2015-2016	120	140
Tektite	2015-2016	370	390
Tektite	2015-2016	230	260
Tektite	2015-2016	280	310
Tektite	2015-2016	330	360
Tektite	2015-2016	690	720
Tektite	2015-2016	340	370
Tektite	2015-2016	150	180
Tektite	2015-2016	390	420
Tektite	2015-2016	320	360
Tektite	2015-2016	170	210
Tektite	2015-2016	410	450
Tektite	2015-2016	590	630
Tektite	2015-2016	250	290
Tektite	2015-2016	110	150
Tektite	2015-2016	200	240
Tektite	2015-2016	90	140
Tektite	2015-2016	390	440
Tektite	2015-2016	210	270
Tektite	2015-2016	210	270
Tektite	2015-2016	200	270
Tektite	2015-2016	280	350
Tektite	2015-2016	220	290
Tektite	2015-2016	100	170
Tektite	2015-2016	300	380
Tektite	2015-2016	360	440
Tektite	2015-2016	420	510
Tektite	2015-2016	220	310
Tektite	2016-2017	350	350
Tektite	2016-2017	440	450
Tektite	2016-2017	630	640
Tektite	2016-2017	380	400
Tektite	2016-2017	210	230
Tektite	2016-2017	200	220
Tektite	2016-2017	180	200
Tektite	2016-2017	290	310
Tektite	2016-2017	150	170
Tektite	2016-2017	140	170
Tektite	2016-2017	580	610
Tektite	2016-2017	40	70
Tektite	2016-2017	450	480
Tektite	2016-2017	370	400
Tektite	2016-2017	270	300
Tektite	2016-2017	300	330
Tektite	2016-2017	440	480
Tektite	2016-2017	360	400
Tektite	2016-2017	390	430
Tektite	2016-2017	360	410
Tektite	2016-2017	440	490
Tektite	2016-2017	70	120
Tektite	2016-2017	270	330
Tektite	2016-2017	290	350
Tektite	2016-2017	260	330
Tektite	2016-2017	140	210
Tektite	2016-2017	420	490
Tektite	2016-2017	830	900
Tektite	2016-2017	310	380
Tektite	2016-2017	270	360
Tektite	2016-2017	390	480
Tektite	2017-2018	180	180
Tektite	2017-2018	470	470
Tektite	2017-2018	220	220
Tektite	2017-2018	350	360
Tektite	2017-2018	360	380
Tektite	2017-2018	430	450
Tektite	2017-2018	400	420
Tektite	2017-2018	170	200
Tektite	2017-2018	120	150
Tektite	2017-2018	330	360
Tektite	2017-2018	400	430
Tektite	2017-2018	420	450
Tektite	2017-2018	200	230
Tektite	2017-2018	170	200
Tektite	2017-2018	490	520
Tektite	2017-2018	610	650
Tektite	2017-2018	210	250
Tektite	2017-2018	410	450
Tektite	2017-2018	230	270
Tektite	2017-2018	480	530
Tektite	2017-2018	450	500
Tektite	2017-2018	480	530
Tektite	2017-2018	610	670
Tektite	2017-2018	330	390
Tektite	2017-2018	160	220
Tektite	2017-2018	310	370
Tektite	2017-2018	300	360
Tektite	2017-2018	50	110
Tektite	2018-2019	610	610
Tektite	2018-2019	650	660
Tektite	2018-2019	530	540
Tektite	2018-2019	380	390
Tektite	2018-2019	500	510
Tektite	2018-2019	450	460
Tektite	2018-2019	370	380
Tektite	2018-2019	80	100
Tektite	2018-2019	360	380
Tektite	2018-2019	360	390
Tektite	2018-2019	430	460
Tektite	2018-2019	530	560
Tektite	2018-2019	100	140
Tektite	2018-2019	100	140
Tektite	2018-2019	450	490
Tektite	2018-2019	450	490
Tektite	2018-2019	220	260
Tektite	2018-2019	200	240
Tektite	2018-2019	250	300
Tektite	2018-2019	310	360
Tektite	2018-2019	450	500
Tektite	2018-2019	270	330
Tektite	2018-2019	360	420
